# Supplementary material
Source: publisher figshare collection journal article supplement (https://acs.figshare.com/ndownloader/files/3741793)
Supplement: Supplementary file 1 [file 3741793]

# Natural Rubber - Filler Interaction: What are the Parameters?

Alan Jenkin Chan,<sup>\*,†,‡,¶</sup> Karine Steenkeste,<sup>†,¶</sup> Alexis Canette,<sup>§</sup> Marie Eloy,<sup>‡</sup>  
Damien Brosseau,<sup>‡</sup> Fabien Gaboriaud,<sup>‡</sup> and Marie-Pierre Fontaine-Aupart<sup>†,¶</sup>

<sup>†</sup>*Université Paris-sud, Institut des Sciences Moléculaires d'Orsay, UMR 8214, Orsay, France,* <sup>‡</sup>*Manufacture Française des Pneumatiques Michelin, 23 place des Carmes Déchaux, 63040 Clermont Ferrand Cedex 9, France,* <sup>¶</sup>*CNRS, Orsay, France, and* <sup>§</sup>*INRA AgroParisTech, Micalis, UMR 1319, Massy, France*

E-mail: alan.chan@u-psud.fr

---

\*To whom correspondence should be addressed

†.  
‡.  
¶.  
§.

## Supporting Information Available

**Supporting Information 1:** Movie sequence of the NR-100nm plain silica heteroaggregation process taken in real-time (4 hours) in  $\text{NaNO}_3$  (left) and  $\text{MgSO}_4$  (right) solutions at 100mM ionic strength. The movie is taken  $\sim 10\mu\text{m}$  above the cover slip surface (substrate).

**Supporting Information 2:** Normalized autocorrelation curves of the mixed solutions of polystyrene (PS) COOH modified particles ( $d=100\text{nm}$ ) in absence (red line) and presence (black line) of NR particles. Identical curves are obtained for all three suspensions (water,  $\text{NaNO}_3$  and  $\text{MgSO}_4$  at 100mM ionic strength). The absence of interaction was also observed for the  $d=20\text{nm}$  PS particles.

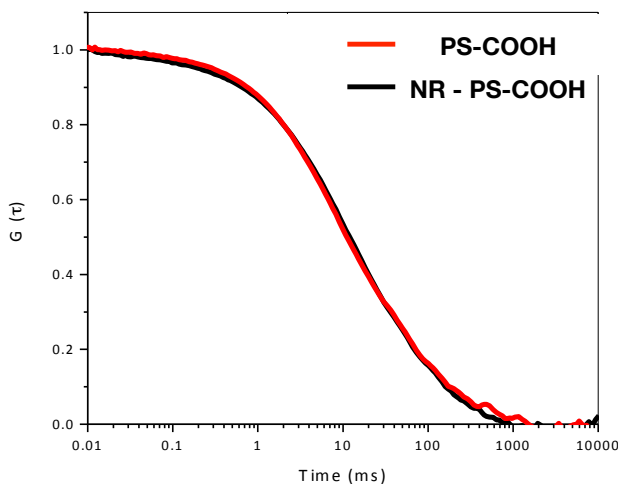

This material is available free of charge via the Internet at <http://pubs.acs.org/>.
